# Supplementary material
Source: publisher site journal article supplement (https://www.dovepress.com/article/604005)
Supplement: Supplementary file 1 [file 604005%20Supplementary%20Material.docx]

**Supplementary File 1 Search strategy using PubMed as an example**

| #1 | "Delay Discounting"[Mesh] OR "intertemporal preference*"[Title/Abstract] OR "intertemporal decision making"[Title/Abstract] OR ("decision making ability"[Title/Abstract]) OR "delayed gratification"[Title/Abstract] OR "intertemporal choice"[Title/Abstract] OR "time discounting"[Title/Abstract] OR "future orientation"[Title/Abstract] |
| --- | --- |
| #2 | "chronic disease"[MeSH Terms] OR "chronic diseases"[Title/Abstract] OR "disease chronic"[Title/Abstract] OR "chronic illness*"[Title/Abstract] OR "illness chronic"[Title/Abstract] OR "chronically ill"[Title/Abstract] OR "chronic condition*"[Title/Abstract] OR "condition chronic"[Title/Abstract] OR "diabetes mellitus"[MeSH Terms] OR "stroke"[MeSH Terms] OR "neoplasms"[MeSH Terms] OR "cardiovascular diseases"[MeSH Terms] OR "Health Behavior"[MeSH Terms] OR "patient compliance"[Title/Abstract] OR "medication adherence"[Title/Abstract] OR "health promotion"[Title/Abstract] OR "primary prevention"[Title/Abstract] OR "lifestyle health*"[Title/Abstract] OR "patient*"[Title/Abstract] OR "clinical"[Title/Abstract] OR "medical"[Title/Abstract] OR "Lifestyle"[Title/Abstract] OR "preventive behavior*"[Title/Abstract] OR "treatment adherence"[Title/Abstract] OR "health risk behavior*"[Title/Abstract] OR "smoking"[Title/Abstract] OR "diet"[Title/Abstract] OR "exercise"[Title/Abstract] OR "alcohol"[Title/Abstract] |
| #3 | #1 AND #2 |

**Supplementary File 2. Summaries of included articles**

| **First author/**  **Year/Country** | **Chronic disease types** | **Attributes** | **Antecedents** | **Consequences** | **Empirical referents** |
| --- | --- | --- | --- | --- | --- |
| Reach632011/France | Diabetes | IC | Impatience | Medication adherence  HbA1c control | Monetary choice questionnaire |
| Lebeau6/2016/France | Diabetes | FHV  FTP | / | Treatment adherence  Glycemic control | Computerized paradigm |
| Axon34/2009/USA | **Hypertension** | / | Time perspective | Treatment and health behaviour adherence | **Monetary choice questions** |
| Deng37/2023/China | Diabetes | FHV | Personality traits  **Health beliefs** | **Self-management behaviors** | **Intertemporal choice questionnaire** |
| Krousel-Wood48/2022/USA | **Hypertension** | FHV | Marital status  Education level  BMI  Time perspective | **Blood pressure control**  Medication adherence | **Monetary choice questions** |
| Karl50/2018/Germany | Diabetes | FHV  FTP | Age  Disease state | Health behaviour adherence | A single item |
| Sheffer7/2018/USA | Cancer | FHV | Disease state | Health behaviour adherence | Delay discounting task |
| Stoianova49/2019/USA | Diabetes | FHV | / | Treatment adherence  HbA1c control | Delay discounting task |
| Vaughn8/2021/Russia | Breast cancer | FHV  FTP  ESR | Death cognition  Fear of recurrence | Treatment adherence | Delay discounting task |
| An YD64/2024/China | Diabetes | FHV  ESR | / | Physical activity  HbA1c control | Quick delay discounting questionnaire |
| Jin2/2024/China | Diabetes | FHV | / | Physical activity  Diabetes-related carotid atherosclerosis | Monetary choice questionnaire |
| Le Clainche46/2024/France | Breast cancer | FHV | Personality traits | **diagnostic delay** | Self-reported question |
| Ding40/2025/China | **Hypertension** | FHV  IC  ESR | Perceived health competence  **Negative emotions** | Physical activity | Delay discounting task |
| Hu65/2025/China | **Hypertension** | FHV  IC | / | Treatment adherence | Delay discounting task |
| Campbell66/2021/USA | Diabetes | FHV  ESR | **Education level**  Health status | HbA1c，  Self-care  life quality  diet  foot care | Quick delay discounting questionnaire |
| Campbell41/2024/USA | Diabetes | FHV  ESR | / | **Psychological outcomes** | Quick delay discounting questionnaire |
| Epstein42/2022/USA | Diabetes | FHV  FTP | **Working Memory** | **Medication adherence** | Delay discounting task |
| Shain52/2022/USA | Diabetes | FHV  IC | Impulsivity | Self-care  **Diabetes complications** | Monetary choice questionnaire |
| Gurmankin47/2006/USA | Breast cancer | FHV | / | / | / |
| Gerhart38/2016/USA | **Prostate cancer** | ESR  IC | **Psychological distress**  **Disease status** | Palliative treatment preference | Delay of gratification checklist |
| Loeb67/2017/USA | **Prostate cancer** | / | / | Active surveillance | / |
| Madsen68/2019/ Denmark | Diabetes | IC  FHV | / | **Self-management** | / |
| Borgmann45/2020/ Germany | Diabetes | / | **Information needs** | / | Self-reported question |
| Satoh69/2021/Janpan | Breast cancer | FHV | / | / | Self-reported question |
| Ei Haj43/2022/France | **Alzheimer’s disease** | FTP | Future thinking | / | Temporal discounting task |
| Facque39/2022/France | Glioma | IC  FHV | / | / | **Intertemporal choice task** |
| Sukumar70/2022/USA | Breast cancer | FHV  ESR  FTP | **Disease status**  **Death perception**  F**inancial toxicity**  **Psychosocial outcomes**  **Age**  H**ousehold income** | Vegetable intake  Weight management | Delay discounting task |
| Brown71/2023/USA | Diabetes | FTP | / | / | Delay discounting task |
| Jarmolowicz72/2023/USA | Multiple sclerosis | FHV | / | **Medication adherence** | Monetary choice questionnaire |
| Kairies-Schwarz73/2024/ Germany | Cardiovascular disease | / | / | Lifesyle | **Experimental procedure** |
| Boonmanun74/2025/ Thailand | Diabetes | FHV  FTP  IC | / | HbA1c level | Monetary choice taask |
| Wu75/2024/China | Coronary heart disease | FHV | **Education level** | **Smoking cessation**  **Diet**  **physical activity** | **Monetary intertemporal choice preference questionnaire** |
| Xie36/2022/China | Parkinson’s disease | FHV | / | / | Delay discounting task |
| Qu76/2025/China | Diabetes | ESR | knowledge | **Self-management** | Quick delay discounting questionnaire |
| Zhang77/2024/China | Diabetes | FHV  ESR |  | Physical activity | Quick delay discounting questionnaire |

Note: “/” means not involved; Abbreviations: IC, impulse control; FHV, future health valuation; ESR, emotional self‑regulation; FTP, future‑oriented thinking and planning；BMI, Body mass index
